1 **Probing individual-level structural atrophy in frontal glioma patients**

2 Guobin Zhang<sup>1#</sup>, Huawei Huang<sup>2#</sup>, Xiaokang Zhang<sup>1#</sup>, Yonggang Wang<sup>1</sup>, Haoyi Li<sup>1</sup>, Yunyun Duan<sup>3</sup>,  
3 Hongyan Chen<sup>3</sup>, Yaou Liu<sup>3</sup>, Bin Jing<sup>4\*</sup>, Song Lin<sup>1\*</sup>

4 <sup>1</sup>Department of Neurosurgery, China National Clinical Research Center for Neurological Diseases  
5 (NCRC-ND), Center of Brain Tumor, Beijing Institute for Brain Disorders, Beijing Key Laboratory of  
6 Brain Tumor, Beijing Tiantan Hospital, Capital Medical University, Beijing, 100070, China

7 <sup>2</sup>Department of Critical Care Medicine, Beijing Tiantan Hospital, Capital Medical University, Beijing,  
8 100070, China

9 <sup>3</sup>Department of Radiology, Beijing Tiantan Hospital, Capital Medical University, Beijing, 100070,  
10 China

11 <sup>4</sup>School of Biomedical Engineering, Capital Medical University, Beijing,100069, China

12

13 <sup>#</sup>Guobin Zhang, Huawei Huang and Xiaokang Zhang contributed equally and should be considered  
14 joint first author.

15 <sup>\*</sup>Bin Jing and Song Lin should be considered joint senior author.

16 **\*Corresponding author**

17 **Name:** Song Lin

18 **Affiliation:** Department of Neurosurgery, China National Clinical Research Center for Neurological  
19 Diseases (NCRC-ND), Center of Brain Tumor, Beijing Institute for Brain Disorders, Beijing Key  
20 Laboratory of Brain Tumor, Beijing Tiantan Hospital, Capital Medical University

21 **Address:** South 4th Ring West Road 119, Fengtai District, Beijing, 100070, China

22 **E-mail:** linsong\_ttyy@sina.com

23 **Tel:** +86 010 59976509

24 **Fax:** +86 010 59976509

25 **Name:** Bin Jing

26 **Affiliation:** School of Biomedical Engineering, Capital Medical University

27 **Address:** No.10 Xi Tou Tiao, You'an Men Wai, Fengtai District, Beijing, 100069, China

28 **E-mail:** bjing@ccmu.edu.cn

29 **Tel:** (+86) 15011101291

30 **Fax:** +86 010 83911552

31

32 **Data Availability:** The data that support the findings of this study are available from the corresponding

33 author upon reasonable request.

34 **Funding:** This work was supported by the National Natural Science Foundation of China (81801042),

35 Beijing Hospital Authority Youth Programme (20190504), Beijing Outstanding Talent Training

36 Foundation, Youth Backbone Individual Project (2018000021469G230) and Beijing Municipal

37 Commission of Education (KM202010025025). The funds had no role in the study design, data

38 collection and analysis, decision to publish, or manuscript preparation.

39 **Conflict of Interest:** The authors declare that they have no competing interests.

40 **Ethics approval:** The study was approved by the Institutional Review Board of Beijing Tiantan

41 Hospital, Capital Medical University, Beijing, China (KY2020-048-01).

42 **Patient consent:** Written informed consent was obtained from all patients.

43 **Acknowledgments:** None.

44

45 **Abstract**

46 Although every glioma patient varies in tumor size, location, histological grade and molecular  
47 biomarkers, structural abnormalities are commonly conducted in a group-level, leading to the miss of  
48 individual structural atrophy. In this study, we introduced an individual-level structural abnormality  
49 detection method for glioma patients and proposed several novel abnormality indexes to depict the  
50 individual atrophy pattern. Forty-five glioma patients in frontal lobe and fifty-two age-matched healthy  
51 controls participated in the study. All patients underwent neurocognitive test and molecular  
52 examinations, including 1p/19q co-deletion, isocitrate dehydrogenase (IDH) mutation, telomerase  
53 reverse transcriptase (TERT) promoter mutation and O6-methylguanine-DNA methyltransferase  
54 (MGMT) promoter methylation. Individual structural abnormality maps for every glioma patient were  
55 calculated from the preoperative T1 images, and the individual abnormality index were further  
56 computed and explored the associations with clinical indicators. The results manifested that: 1. Every  
57 glioma patient show unique atrophy pattern; 2. Glioma patients also share consistent atrophy regions; 3.  
58 The atrophy pattern is influenced by some molecular biomarkers. Our study provides an effective way  
59 to access the individual structural abnormalities in glioma patients, and displays great potentials in  
60 individualized precision medicine for glioma patients.

61 **Keywords:** frontal glioma, structural MRI, individual structural atrophy, abnormality index, molecular  
62 indicators

63

64 **Introduction**

65 Gliomas represent the majority of primary central nervous system (CNS) malignant  
66 tumors, and the surgical outcomes are dependent on the comprehensive acquirement  
67 of various diagnostic information including histological grades and molecular  
68 biomarkers. However, these golden standard indicators are hard to acquire before  
69 neurosurgery, and neuroimaging has consequently served as a key way to perceive the  
70 glioma status. There are many imaging modalities collected for glioma patients, such  
71 as diffusion weighted/tensor imaging (DWI/DTI), resting-state functional MRI  
72 (rs-fMRI), positron emission tomography (PET) and structural magnetic resonance  
73 imaging (sMRI). Among them, sMRI (e.g. T1, T2) is an easy-to-collect and  
74 economical modality with high spatial resolution and test-retest reliability, which is  
75 thus widely collected in most neurosurgical centers. Usually, neurosurgeons only take  
76 qualitative evaluations for the tumor regions on structural images through visual  
77 inspection, and an individual-level quantitative analysis for tumor-related alterations  
78 is still lacking in clinical presurgical evaluation.

79

80 With the appearance of Radiomics, the quantitative analysis for the tumor region on  
81 structural images has been demonstrated to provide useful information about the  
82 histological/molecular biomarkers(Lohmann et al., 2018; Lu et al., 2018; Soike et al.,  
83 2018; Takahashi et al., 2019). However, the alterations in non-tumor regions are rarely  
84 to access in Radiomics studies, which may be also important to the postsurgical  
85 prognosis. Although the conventional morphological analysis such as voxel-based

86 morphometry could detect structural changes (e.g. contralateral hemisphere) for  
87 glioma patients, the results are based on the group-level statistical analysis and the  
88 structural changes at individual level are still not clear. Specifically, every glioma  
89 patient may suffer unique structural alterations in non-tumor regions, and detecting  
90 and quantifying individual-level structural alterations may further deepen the  
91 understanding of the influences of tumor regions.

92

93 In recent years, individualized neuroimaging has appeared and displayed great  
94 potentials in precision diagnosis and treatment(Liu, Liu, Wang, & Dahmani, 2020;  
95 Wang et al., 2015). Stoecklein et al. found individual functional connectivity  
96 characteristics of glioma patients were significantly related with WHO tumor grade  
97 and the IDH mutation status(Stoecklein et al., 2020). However, rs-fMRI is not a  
98 clinical routine scan sequence, and to collect a high quality rs-fMRI dataset is also  
99 challenging for glioma patients. In this condition, sMRI becomes an alternative choice  
100 to model the individual alterations in the brain. Previous studies(Perry et al., 2017)  
101 have manifested W-score could successfully measure individual gray matter changes  
102 in neurological diseases, which is firstly introduced into glioma patients in the study.  
103 Furthermore, we extend the W-score method to both gray matter and white matter,  
104 and propose several novel structural abnormality indexes to depict the individual  
105 structural alteration patterns. The main purposes of the study are to ascertain: 1.  
106 Whether frontal glioma patients display unique structural alterations for every subject?  
107 2. Whether frontal glioma patients display consensus structural alterations and where

108 are they located? 3. Whether individual atrophy patterns vary with clinical and  
109 molecular indicators?

110

## 111 **Materials and Methods**

### 112 **Patients**

113 The study was approved by the Institutional Review Board of Beijing Tiantan  
114 Hospital, Capital Medical University, Beijing, China (KY2020-048-01). The study  
115 was also registered at Chinese Clinical Trial Registry (ChiCTR2000031805). All study  
116 procedures were in accordance with the Declaration of Helsinki. Written informed  
117 consent was obtained from all patients. Fifty-two glioma patients and one hundred  
118 seventeen healthy controls participated this study, which were listed in Table 1. All  
119 gliomas in the cohort were diagnosed according to the criteria of the WHO  
120 classification system in the revised version of 2016. Inclusion criteria were suspected,  
121 newly diagnosed glioma with only one cancer region in the brain and age over 18  
122 years. Exclusion criteria were previous cranial surgery, neuropsychiatric  
123 comorbidities, and any contraindications to MR scanning such as metal implants.  
124 Neuropsychological testing was conducted prior to the first MRI scan using the  
125 *Montreal Cognitive Assessment* (MOCA) test. Histological confirmation of the  
126 diagnosis was obtained by surgical resection. Molecular markers, including 1p/19q  
127 codeletion, IDH1/2 mutation, TERT promoter mutation and O<sup>6</sup>-methylguanine-DNA  
128 methyltransferase (MGMT) promoter methylation were all collected. Chromosomes 1  
129 and 19 were analyzed by the fluorescence in situ hybridization method, and the

130 IDH1/2 mutation and TERT promoter mutation were detected by sequence analysis,  
131 both following a previously described protocol(Suh, Kim, Jung, Choi, & Kim, 2019).  
132 MGMT promoter methylation was assessed by methylation-specific PCR as described  
133 previously by our team(Zhang et al., 2013). Patients were followed with routine  
134 clinical visits after initiation of therapy. All age-matched healthy controls were  
135 recruited from the local community and university students.

136

### 137 **Structural MRI acquirement**

138 All subjects were scanned with a Philips Ingenia 3.0T MRI scanner at Beijing Tiantan  
139 Hospital. For both glioma patients and healthy controls, T1 sequence was collected  
140 with the following parameters: TR: 6.5 ms, TE: 3.0 ms, Flip angle: 8°, voxel size:  
141  $1 \times 1 \times 1 \text{ mm}^3$ , image dimension:  $256 \times 256 \times 196$ . In addition, T2-flair was also scanned  
142 for glioma patients with the listed parameters: TR: 4.8 s, TE: 0.34 s, Flip angle: 90°,  
143 voxel size:  $0.625 \times 0.625 \times 0.55 \text{ mm}^3$ , image dimension:  $400 \times 400 \times 300$ .

144

### 145 **Image processing**

146 The tumor region of every patient was extracted from T2-flair images with two  
147 sequential steps: 1. launch an automatic segmentation by ITK-SNAP software; 2.  
148 manually correct the segmentation by experienced neurosurgeons. After the  
149 segmentation, individual T2-flair image was co-registered to its corresponding T1  
150 image by SPM software, and the transformation matrix was used on the segmented  
151 tumor to obtain the matched tumor region in T1 image space.

152

153 Individual T1 images were processed with CAT12 software to calculate the brain  
154 tissue volume. The skull stripping and correction for bias-field inhomogeneities were  
155 subsequently conducted. After that, the whole brain was segmented into different  
156 tissue types, e.g. gray matter and white matter. Then, the segmented GM and WM  
157 images were normalized to the MNI standard space with a modulation manner by  
158 DARTEL algorithm. Finally, the normalized GM and WM images were smoothed  
159 with 4-mm FWHM Gaussian kernel.

160

### 161 **Individual structural atrophy map**

162 Figure 1 illustrated the flowchart to generate individual structural atrophy map. First  
163 of all, all healthy controls were used to construct the normative brain volume model.  
164 In this model, general linear model (GLM) was adopted to discover the relationship  
165 between voxel-wise volume and variables including age, sex, and total intracranial  
166 volume (TIV) as the following equation.

$$volume = \beta_1 \times age + \beta_2 \times sex + \beta_3 \times TIV + residual \quad (1)$$

167 Here,  $\beta_1$ ,  $\beta_2$ ,  $\beta_3$  were weights for age, sex and TIV on the voxel-wise volume, and GM  
168 and WM volume models were respectively constructed.

169

170 Once the models had been created, the individual structural abnormality map for each  
171 glioma patient was calculated based on W score, which was calculated as following:

$$W\ score = \frac{volume_{patient} - \beta_1 \times age_{patient} - \beta_2 \times sex_{patient} - \beta_3 \times TIV_{patient}}{standard\ deviation\ of\ residuals\ in\ normative\ model} \quad (2)$$



173

174 After the calculation of  $W$  score for each patient, a cutoff threshold ( $|W|>6$ ) and a  
175 cluster size ( $K>100$ ) were set to generate the individual structural abnormality map.  
176 Notably, an individualized explicit non-tumor mask was produced for every patient in  
177 which individual tumor mask was deleted from the tissue (GM/WM) prior probability  
178 template (threshold: 0.2). Based on the individual structural abnormality map, we  
179 further proposed 4 novel abnormality indexes on GM/WM to reflect the  
180 characteristics of structural damages induced by glioma: Ipsilateral atrophy ratio,  
181 Contralateral atrophy ratio, Non-cancer atrophy ratio, Relative atrophy ratio, which  
182 were listed in details in Table 2.

183

#### 184 **Associations with various glioma indicators**

185 To explore the associations between each of 8 abnormality indexes and various  
186 glioma indicators, for continuous variables like tumor volume, MGMT methylation,  
187 and MOCA score, Spearman correlation was used to ascertain the linear relationship  
188 with these atrophy indexes; for categorical variables such as TERT mutation, 1p/19q  
189 deletion, histological grade and IDH1, two-sample T test was used to determine  
190 whether the atrophy indexes varied with these indicators. An FDR corrected  $P < 0.05$   
191 was thought as the significance level for both analyses.

192

## 193 **Results**

### 194 **The clinical characteristics for glioma patients**

195 There were 45 glioma patients (mean age  $43.2 \pm 9.7$  years, 29 male) and 51 healthy  
196 controls (mean age  $42.6 \pm 9.7$  years, 24 male) that participated in the study. All patients  
197 were prospectively included between May 2019 and July 2020. The WHO  
198 histological grade, IDH1, TERT mutation, 1p/19q deletion, MGMT methylation were  
199 acquired for every patient, and Montreal Cognitive Assessment (MOCA) score was  
200 also recorded. Table 1 summarized the demographic and clinical information for all  
201 subjects.

202

### 203 **Every glioma patient displayed distinct atrophy pattern**

204 All patients only displayed atrophies in GM and WM. Figure 2 illustrated three  
205 selected patients' T1 images and corresponding individualized GM/WM atrophy maps  
206 (mapping back into T1 space). Obviously, the structural atrophies not only lay in  
207 regions close to tumors but also in regions far away from tumors. Although the  
208 patients vary in tumor sizes and tumor grades, it is clear that every subject displayed  
209 unique atrophy pattern.

210

### 211 **Every glioma patient also showed common atrophy regions**

212 Figure 3 displayed the overlapping GM regions in individual structural atrophy map.  
213 No matter the tumor is located at the left hemisphere or right hemisphere, the  
214 atrophies in right temporal lobe are more obvious than the left one, mainly including  
215 hippocampus, amygdala, parahippocampus and thalamus. Moreover, the contralateral  
216 frontal regions also displayed some degree of atrophy. Figure 4 exemplified the

217 consistent WM regions in individual structural atrophy map. The main atrophy  
218 regions are located at bilateral thalamus and pallidum, and the contralateral part is  
219 more severely atrophied than the ipsilateral part.

220

### 221 **Individual brain atrophy indexes were associated with some clinical indicators**

222 Fig 5 illustrated all possible relations between the proposed individual abnormality  
223 indexes and clinical indicators, and all of them had passed an FDR correction with  
224  $P < 0.05$ . GM/WM relative atrophy ratio were found to significantly correlate with the  
225 tumor size, however, with the increasement of the tumor volume, the relative atrophy  
226 ratio was decreased (power law distribution), and no other individual structural  
227 indexes were related with tumor size. WM contralateral atrophy ratio was found with  
228 significant differences between IDH wild type and mutation type, while WM relative  
229 atrophy ratio were obviously different between 1p/19q wild type and mutation type.  
230 Moreover, both GM/WM relative atrophy ratio displayed between-group differences  
231 in TERT wild type and mutation type. No other relationships were detected with  
232 MOCA and MGMT.

233

### 234 **Discussion**

235 In this study, we firstly depicted individual non-tumor structural atrophy  
236 characteristics for glioma patients, and proposed several quantitative indexes to  
237 ascertain the relationship between individual atrophy patterns and clinical indicators.

238 The results demonstrated every glioma patient displays distinct atrophy pattern but

239 also shared overlapping atrophy regions. In addition, several atrophy indexes were  
240 related with tumor size and molecular indicators.

241

242 Neuroimaging has acted as indispensable tool for presurgical assessment of glioma  
243 patients. However, most imaging studies only focus on the tumor region in order to  
244 judge the status of tumor, and the non-tumor alterations are rarely to access. Moreover,  
245 neuroimaging is usually used by two conventional manner: 1. visual inspection by  
246 experienced neurosurgeons; 2. group-level statistical comparison between glioma  
247 patients and healthy controls. Both manners may miss the individual unique changes  
248 in non-tumor regions. Our study firstly offers an individual-level manner to describe  
249 individual atrophy in every glioma patient, and manifested that every glioma patient  
250 displays unique structural atrophy in non-tumor regions, which was consistent with  
251 previous individual fMRI study(Stoecklein et al., 2020). Taken together, glioma may  
252 lead to patient-specific alterations in both brain function and structure, and  
253 individualized neuroimaging methods show great potentials in the pre-surgical  
254 evaluation and post-surgical prognosis estimation.

255

256 Although glioma patients display distinct structural atrophy at the individual level, it  
257 is interesting to find they also share overlapping GM atrophies in regions like bilateral  
258 hippocampus, amygdala, thalamus and parahippocampus. Specially, these atrophies  
259 are not dependent on the hemisphere of tumor, tumor size, histological grade or  
260 molecular indicators, indicating that frontal glioma could introduce systematic

261 atrophy in brain structure. In addition, GM atrophy were more obvious in right  
262 temporal lobe than the left one regardless the tumor hemisphere, implying right  
263 temporal lobe is more vulnerable to the frontal tumor, and there is lateralization in the  
264 structural damages induced by the frontal tumor. Previous literatures have reported  
265 that as many as 90% of brain tumor patients would show tumor-related cognitive  
266 deficits (e.g., memory, attention, information processing, executive function)(Gehring,  
267 Roukema, & Sitskoorn, 2012; Gehring, Sitskoorn, Aaronson, & Taphoorn, 2008),  
268 which may be explained by the current findings that limbic system including  
269 hippocampus, amygdala, parahippocampus and thalamus are damaged in glioma  
270 patients.

271

272 The consistent WM atrophies were mainly located at bilateral thalamus and pallidum,  
273 and the contralateral hemisphere was more severely atrophied than the ipsilateral one.  
274 These regions are involved in two fiber bundles linking fronto-temporal regions:  
275 superior longitudinal fasciculus (SLF) and uncinate fasciculus (UF). SLF has been  
276 reported to correlate with the spatial working memory deficit(Kinoshita et al., 2016),  
277 visuospatial dysfunction(Nakajima et al., 2017) and transmission of speech and  
278 language(Henderson, Abdullah, Verma, & Brem, 2020) in glioma patients. UF has  
279 been demonstrated to relate with the language(Duffau, Gatignol, Moritz-Gasser, &  
280 Mandonnet, 2009) and cognitive deficits(Incekara, Satoer, Visch-Brink, Vincent, &  
281 Smits, 2018) in glioma patients. The common WM atrophies also prompt the possible  
282 cognitive damages in frontal glioma patients, and may provide a possible pathway

283 that link the remote GM atrophy covariation.

284

285 GM/WM relative atrophy ratio but not other individual indexes were negatively  
286 related (in fact power law distribution) with tumor volume, and two conclusions may  
287 thereby be generated: 1. the volume of atrophy in the brain was in fact not dependent  
288 on the tumor volume; 2. the relative atrophy volume becomes smaller when the tumor  
289 volume enlarges. Moreover, WM contralateral/relative atrophy ratio were found with  
290 significant differences in IDH and 1p/19q mutation. IDH and 1p/19q are both known  
291 indicators for the prognosis of glioma patients. For example, lower grade gliomas  
292 with wild-type IDH were reported to show similar prognosis with glioblastomas, and  
293 IDH mutated glioblastomas were found with better prognosis than IDH wild-type  
294 glioblastomas(Darvishi et al., 2020; Hartmann et al., 2010). In addition, anaplastic  
295 gliomas with IDH wild-type have worse prognosis than glioblastomas with IDH  
296 mutation(Hartmann et al., 2010). 1p/19q co-deletion is found with better prognosis for  
297 patients with oligodendroglioma after radiotherapy or alkylating  
298 chemotherapy(Jenkins et al., 2006; van der Voort et al., 2019). Additionally, GM/WM  
299 relative atrophy ratio were found differences in TERT mutation, which is also a  
300 promising indicator for the treatment response of radiotherapy and temozolomide in  
301 primary glioblastoma multiforme (GBM)(Eckel-Passow et al., 2015; Peng et al., 2020;  
302 Vuong et al., 2017; Yang et al., 2016; Yuan et al., 2016). In summary, individual  
303 structural atrophy patterns are influenced by the genetic type.

304

305 Finally, several limitations should be mentioned: 1. The optimal threshold for W is not  
306 clear, and we chose  $|W|>6$  in order to reduce the false positive rate in atrophy  
307 detection. 2. The gender and TIV are not well matched between glioma patients and  
308 healthy controls, and future studies could involve more patients from multicenter to  
309 verify the robustness of the current findings.

310

### 311 **Conclusion**

312 Our study firstly depicted the individual atrophy pattern for glioma patients, and  
313 found individual structural atrophy was unique and driven by genetic information.  
314 Our findings could provide valuable information for the individualized presurgical  
315 evaluation and postsurgical prognosis.

316

317 **Reference**

- 318 Darvishi, P., Batchala, P. P., Patrie, J. T., Poisson, L. M., Lopes, M. B., Jain, R., . . . Patel, S. H. (2020).  
319 Prognostic Value of Preoperative MRI Metrics for Diffuse Lower-Grade Glioma Molecular  
320 Subtypes. *AJNR Am J Neuroradiol*, *41*(5), 815-821. doi:10.3174/ajnr.A6511
- 321 Duffau, H., Gatignol, P., Moritz-Gasser, S., & Mandonnet, E. (2009). Is the left uncinate fasciculus  
322 essential for language? A cerebral stimulation study. *J Neurol*, *256*(3), 382-389.  
323 doi:10.1007/s00415-009-0053-9
- 324 Eckel-Passow, J. E., Lachance, D. H., Molinaro, A. M., Walsh, K. M., Decker, P. A., Sicotte, H., . . .  
325 Jenkins, R. B. (2015). Glioma Groups Based on 1p/19q, IDH, and TERT Promoter Mutations  
326 in Tumors. *N Engl J Med*, *372*(26), 2499-2508. doi:10.1056/NEJMoa1407279
- 327 Gehring, K., Roukema, J. A., & Sitskoorn, M. M. (2012). Review of recent studies on interventions for  
328 cognitive deficits in patients with cancer. *Expert Rev Anticancer Ther*, *12*(2), 255-269.  
329 doi:10.1586/era.11.202
- 330 Gehring, K., Sitskoorn, M. M., Aaronson, N. K., & Taphoorn, M. J. (2008). Interventions for cognitive  
331 deficits in adults with brain tumours. *Lancet Neurol*, *7*(6), 548-560.  
332 doi:10.1016/s1474-4422(08)70111-x
- 333 Hartmann, C., Hentschel, B., Wick, W., Capper, D., Felsberg, J., Simon, M., . . . von Deimling, A.  
334 (2010). Patients with IDH1 wild type anaplastic astrocytomas exhibit worse prognosis than  
335 IDH1-mutated glioblastomas, and IDH1 mutation status accounts for the unfavorable  
336 prognostic effect of higher age: implications for classification of gliomas. *Acta Neuropathol*,  
337 *120*(6), 707-718. doi:10.1007/s00401-010-0781-z
- 338 Henderson, F., Abdullah, K. G., Verma, R., & Brem, S. (2020). Tractography and the connectome in  
339 neurosurgical treatment of gliomas: the premise, the progress, and the potential. *Neurosurg*  
340 *Focus*, *48*(2), E6. doi:10.3171/2019.11.Focus19785
- 341 Incekara, F., Satoer, D., Visch-Brink, E., Vincent, A., & Smits, M. (2018). Changes in language white  
342 matter tract microarchitecture associated with cognitive deficits in patients with presumed  
343 low-grade glioma. *J Neurosurg*, 1-9. doi:10.3171/2017.12.Jns171681
- 344 Jenkins, R. B., Blair, H., Ballman, K. V., Giannini, C., Arusell, R. M., Law, M., . . . Buckner, J. C.  
345 (2006). A t(1;19)(q10;p10) mediates the combined deletions of 1p and 19q and predicts a  
346 better prognosis of patients with oligodendroglioma. *Cancer Res*, *66*(20), 9852-9861.  
347 doi:10.1158/0008-5472.Can-06-1796
- 348 Kinoshita, M., Nakajima, R., Shinohara, H., Miyashita, K., Tanaka, S., Okita, H., . . . Hayashi, Y.  
349 (2016). Chronic spatial working memory deficit associated with the superior longitudinal  
350 fasciculus: a study using voxel-based lesion-symptom mapping and intraoperative direct  
351 stimulation in right prefrontal glioma surgery. *J Neurosurg*, *125*(4), 1024-1032.  
352 doi:10.3171/2015.10.Jns1591
- 353 Liu, H., Liu, W. J., Wang, D., & Dahmani, L. (2020). Individual-Specific Analysis for Psychoradiology.  
354 *Neuroimaging Clin N Am*, *30*(1), 45-51. doi:10.1016/j.nic.2019.09.003
- 355 Lohmann, P., Lerche, C., Bauer, E. K., Steger, J., Stoffels, G., Blau, T., . . . Galldiks, N. (2018).  
356 Predicting IDH genotype in gliomas using FET PET radiomics. *Sci Rep*, *8*(1), 13328.  
357 doi:10.1038/s41598-018-31806-7
- 358 Lu, C. F., Hsu, F. T., Hsieh, K. L., Kao, Y. J., Cheng, S. J., Hsu, J. B., . . . Chen, C. Y. (2018). Machine  
359 Learning-Based Radiomics for Molecular Subtyping of Gliomas. *Clin Cancer Res*, *24*(18),



- 360 4429-4436. doi:10.1158/1078-0432.Ccr-17-3445
- 361 Nakajima, R., Kinoshita, M., Miyashita, K., Okita, H., Genda, R., Yahata, T., . . . Nakada, M. (2017).  
362 Damage of the right dorsal superior longitudinal fascicle by awake surgery for glioma causes  
363 persistent visuospatial dysfunction. *Sci Rep*, 7(1), 17158. doi:10.1038/s41598-017-17461-4
- 364 Peng, H., Huo, J., Li, B., Cui, Y., Zhang, H., Zhang, L., & Ma, L. (2020). Predicting Isocitrate  
365 Dehydrogenase (IDH) Mutation Status in Gliomas Using Multiparameter MRI Radiomics  
366 Features. *J Magn Reson Imaging*. doi:10.1002/jmri.27434
- 367 Perry, D. C., Brown, J. A., Possin, K. L., Datta, S., Trujillo, A., Radke, A., . . . Seeley, W. W. (2017).  
368 Clinicopathological correlations in behavioural variant frontotemporal dementia. *Brain*,  
369 140(12), 3329-3345. doi:10.1093/brain/awx254
- 370 Soike, M. H., McTyre, E. R., Shah, N., Puchalski, R. B., Holmes, J. A., Paulsson, A. K., . . . Chan, M.  
371 D. (2018). Glioblastoma radiomics: can genomic and molecular characteristics correlate with  
372 imaging response patterns? *Neuroradiology*, 60(10), 1043-1051.  
373 doi:10.1007/s00234-018-2060-y
- 374 Stoecklein, V. M., Stoecklein, S., Galiè, F., Ren, J., Schmutzer, M., Unterrainer, M., . . . Liu, H. (2020).  
375 Resting-state fMRI detects alterations in whole brain connectivity related to tumor biology in  
376 glioma patients. *Neuro Oncol*, 22(9), 1388-1398. doi:10.1093/neuonc/noaa044
- 377 Suh, C. H., Kim, H. S., Jung, S. C., Choi, C. G., & Kim, S. J. (2019). Imaging prediction of isocitrate  
378 dehydrogenase (IDH) mutation in patients with glioma: a systemic review and meta-analysis.  
379 *Eur Radiol*, 29(2), 745-758. doi:10.1007/s00330-018-5608-7
- 380 Takahashi, S., Takahashi, W., Tanaka, S., Haga, A., Nakamoto, T., Suzuki, Y., . . . Saito, N. (2019).  
381 Radiomics Analysis for Glioma Malignancy Evaluation Using Diffusion Kurtosis and Tensor  
382 Imaging. *Int J Radiat Oncol Biol Phys*, 105(4), 784-791. doi:10.1016/j.ijrobp.2019.07.011
- 383 van der Voort, S. R., Incekara, F., Wijnenga, M. M. J., Kapas, G., Gardeniers, M., Schouten, J. W., . . .  
384 Smits, M. (2019). Predicting the 1p/19q Codeletion Status of Presumed Low-Grade Glioma  
385 with an Externally Validated Machine Learning Algorithm. *Clin Cancer Res*, 25(24),  
386 7455-7462. doi:10.1158/1078-0432.Ccr-19-1127
- 387 Vuong, H. G., Altibi, A. M. A., Duong, U. N. P., Ngo, H. T. T., Pham, T. Q., Chan, A. K., . . . Hassell, L.  
388 (2017). TERT promoter mutation and its interaction with IDH mutations in glioma: Combined  
389 TERT promoter and IDH mutations stratifies lower-grade glioma into distinct survival  
390 subgroups-A meta-analysis of aggregate data. *Crit Rev Oncol Hematol*, 120, 1-9.  
391 doi:10.1016/j.critrevonc.2017.09.013
- 392 Wang, D., Buckner, R. L., Fox, M. D., Holt, D. J., Holmes, A. J., Stoecklein, S., . . . Liu, H. (2015).  
393 Parcellating cortical functional networks in individuals. *Nat Neurosci*, 18(12), 1853-1860.  
394 doi:10.1038/nn.4164
- 395 Yang, P., Cai, J., Yan, W., Zhang, W., Wang, Y., Chen, B., . . . Jiang, T. (2016). Classification based on  
396 mutations of TERT promoter and IDH characterizes subtypes in grade II/III gliomas. *Neuro  
397 Oncol*, 18(8), 1099-1108. doi:10.1093/neuonc/nov021
- 398 Yuan, Y., Qi, C., Maling, G., Xiang, W., Yanhui, L., Ruofei, L., . . . Qing, M. (2016). TERT mutation in  
399 glioma: Frequency, prognosis and risk. *J Clin Neurosci*, 26, 57-62.  
400 doi:10.1016/j.jocn.2015.05.066
- 401 Zhang, G. B., Cui, X. L., Sui, D. L., Ren, X. H., Zhang, Z., Wang, Z. C., & Lin, S. (2013). Differential  
402 molecular genetic analysis in glioblastoma multiforme of long- and short-term survivors: a  
403 clinical study in Chinese patients. *J Neurooncol*, 113(2), 251-258.



405 **Table 1** The demographic and clinical information of all subjects.

|                                                         | Glioma patients | Healthy controls |
|---------------------------------------------------------|-----------------|------------------|
| Number                                                  | 45              | 51               |
| Gender (M/F)                                            | 29/16           | 24/27            |
| Age                                                     | 43.2±9.7        | 42.6±9.7         |
| TIV                                                     | 1475.1±114.0    | 1425.9±144.9     |
| Tumor volume                                            | 37.6±38.0       | -                |
| Histological grade (□/□/□)                              | 33/10/2         | -                |
| IDH1 mutation (mutated/wild)                            | 39/6            | -                |
| TERT promoter mutation<br>(mutated/wild)                | 33/19           | -                |
| 1p/19q deletion (both 1p/19q /only<br>19q/only 1p/none) | 24/2/4/15       | -                |
| MGMT promoter methylation                               | 0.25±0.16       | -                |
| MOCA                                                    | 22.6±4.6        | -                |

406 Abbreviation: IDH, isocitrate dehydrogenase; MGMT, O<sup>6</sup>-methylguanine-DNA methyltransferase;

407 MOCA, Montreal Cognitive Assessment; TERT, telomerase reverse transcriptase; TIV, total

408 intracranial volume.

409

410 **Table 2** The proposed 8 structural abnormality indexes.

| <b>Abnormality index</b>    | <b>Description</b>                                                                                                                    |
|-----------------------------|---------------------------------------------------------------------------------------------------------------------------------------|
| Ipsilateral atrophy ratio   | $= \frac{\text{number of GM/WM atrophy voxels in hemisphere with tumor}}{\text{number of all voxels in hemisphere with tumor}}$       |
| Contralateral atrophy ratio | $= \frac{\text{number of GM/WM atrophy voxels in contralateral hemisphere}}{\text{number of all voxels in contralateral hemisphere}}$ |
| Non-cancer atrophy ratio    | $= \frac{\text{number of abnormal GM/WM voxels in non - cancer region}}{\text{number of all voxels in whole brain}}$                  |
| Relative atrophy ratio      | $= \frac{\text{number of abnormal GM/WM voxels in non - cancer region}}{\text{number of all voxels in cancer region}}$                |

411 Abbreviation: GM, gray matter; WM, white matter.

412 **Figure legends**

413 **Figure 1** The flowchart of the proposed structural abnormality indexes: (A). the construction of  
414 normative brain volume model; (B). the calculation of the proposed individual abnormality indexes.

415

416 **Figure 2** Three examples of individualized GM/WM abnormality maps.

417

418 **Figure 3** Overlapping gray matter atrophy in non-tumor regions for all patients with tumor on (A) left  
419 hemisphere and (B) right hemisphere.

420

421 **Figure 4** Overlapping white matter atrophy in non-tumor regions for all patients with tumor on left  
422 hemisphere and right hemisphere.

423

424 **Figure 5** The relationship between abnormality indexes and clinical/molecular indicators.

425

426

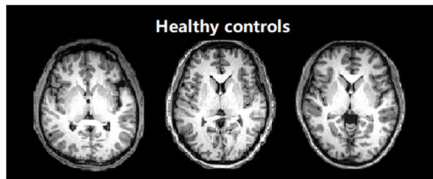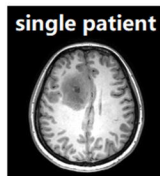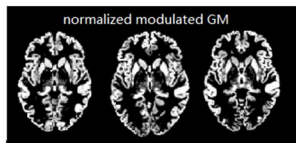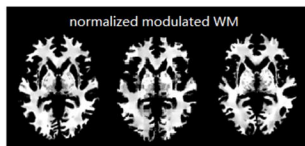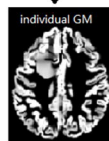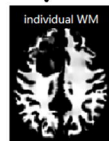

Voxel-wise GLM model for GM

Voxel-wise GLM model for WM

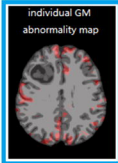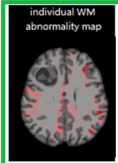

$\beta_{age}$   $\beta_{sex}$   $\beta_{TIV}$  Residual

$\beta_{age}$   $\beta_{sex}$   $\beta_{TIV}$  Residual

individual abnormality indexes

(A)

(B)

**T1 image**

**individualized GM  
atrophy map**

**individualized WM  
atrophy map**

**Patient 1  
WHO IV**

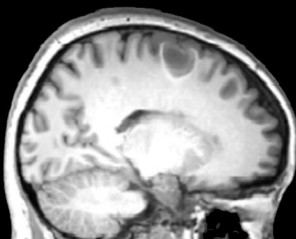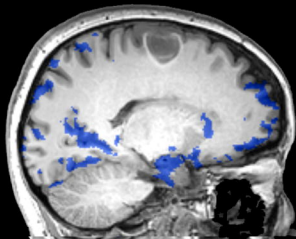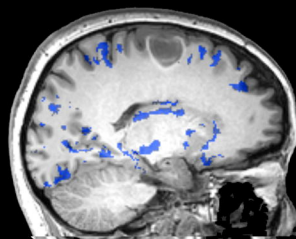

**Patient 2  
WHO III**

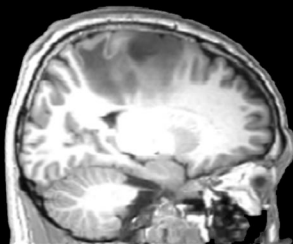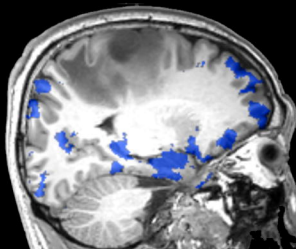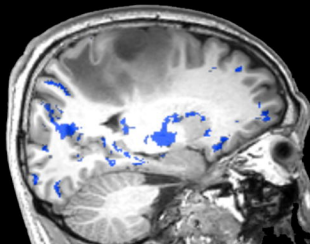

**Patient 3  
WHO II**

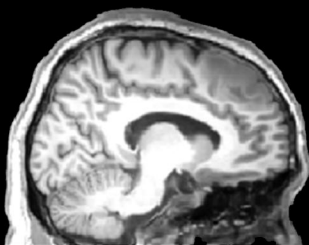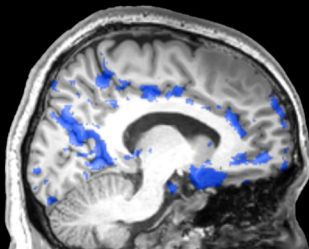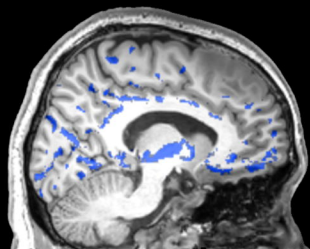

# The shared GM atrophy regions among patients

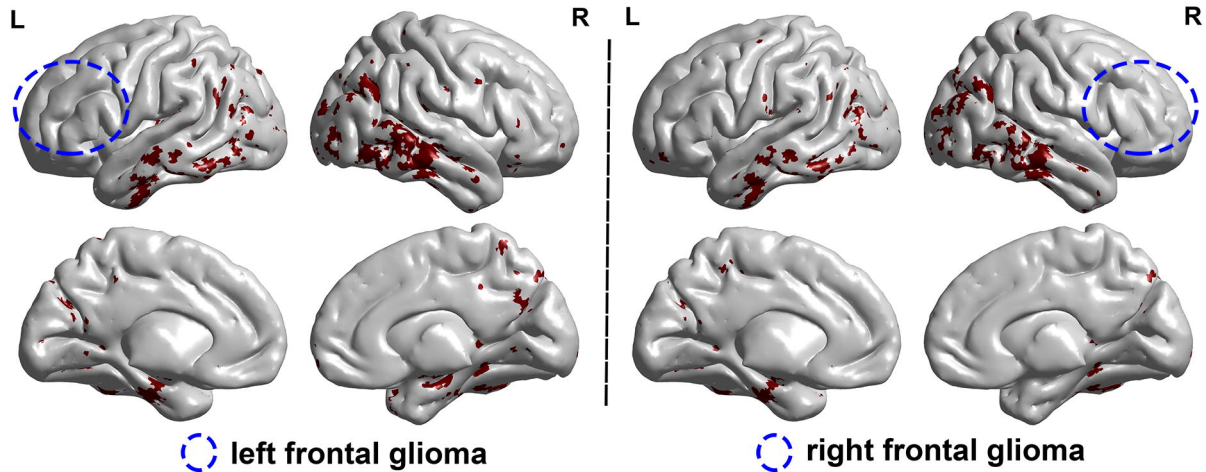



# The shared WM atrophy regions among patients

Z=58

Z=74

Z=90

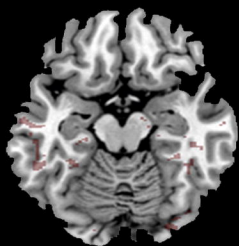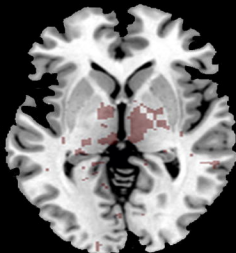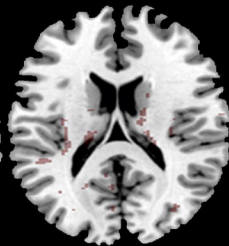

Left glioma patients

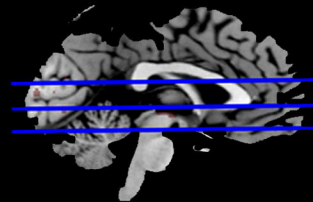

Z=58

Z=74

Z=90

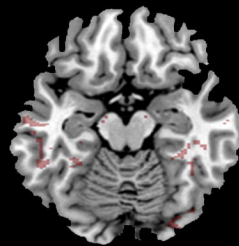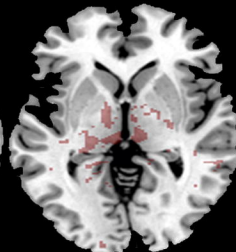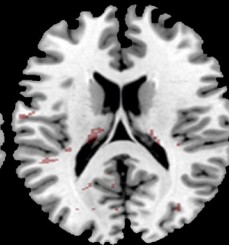

Right glioma patients

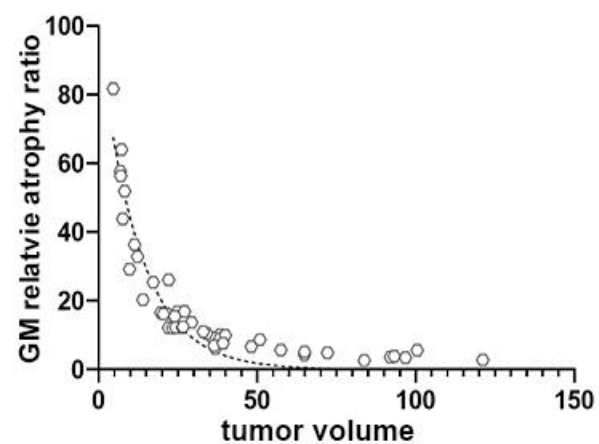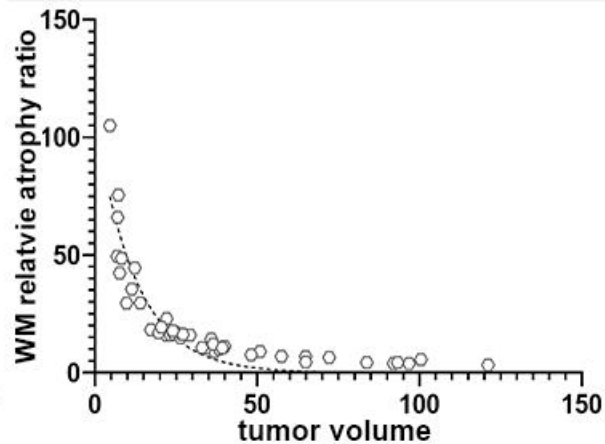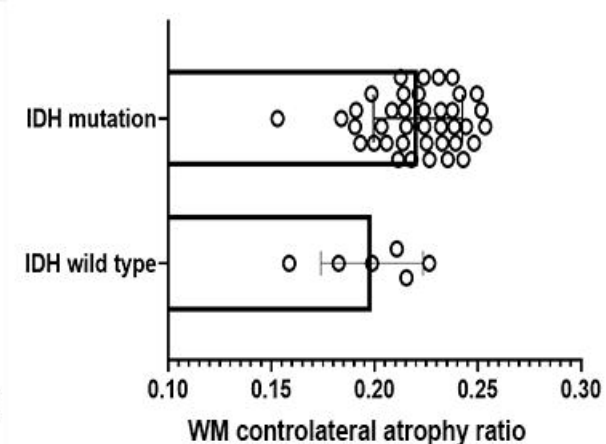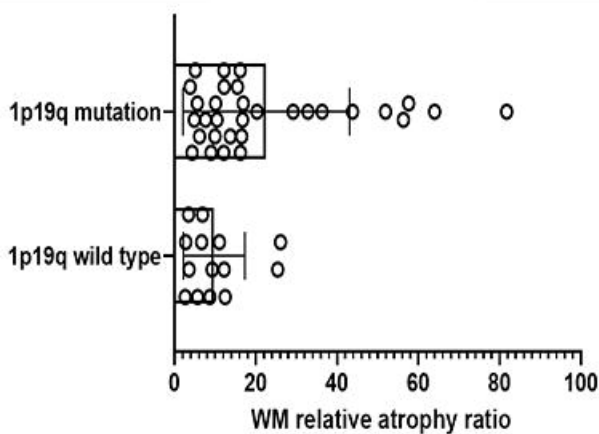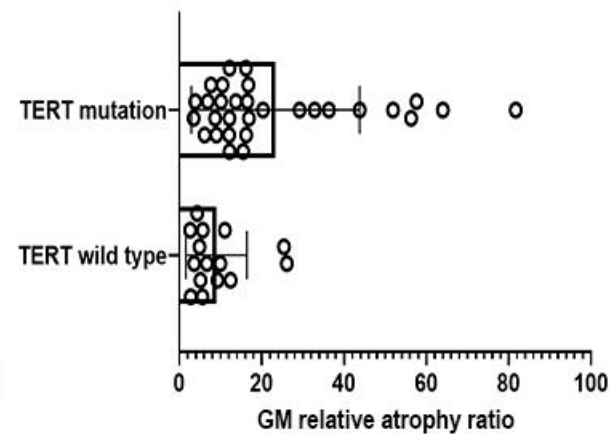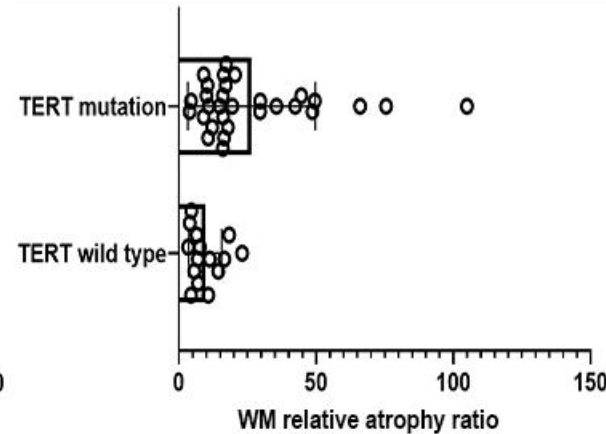

Source: http://biorxiv.org/content/10.1101/2021.01.30.428923v2.full.pdf
